# Supplementary material
Source: PubMed Central journal article supplement (PMC2850002)
Supplement: pp.109.148262_1.pdf [file pp.109.148262_1.pdf]

Supplemental Data

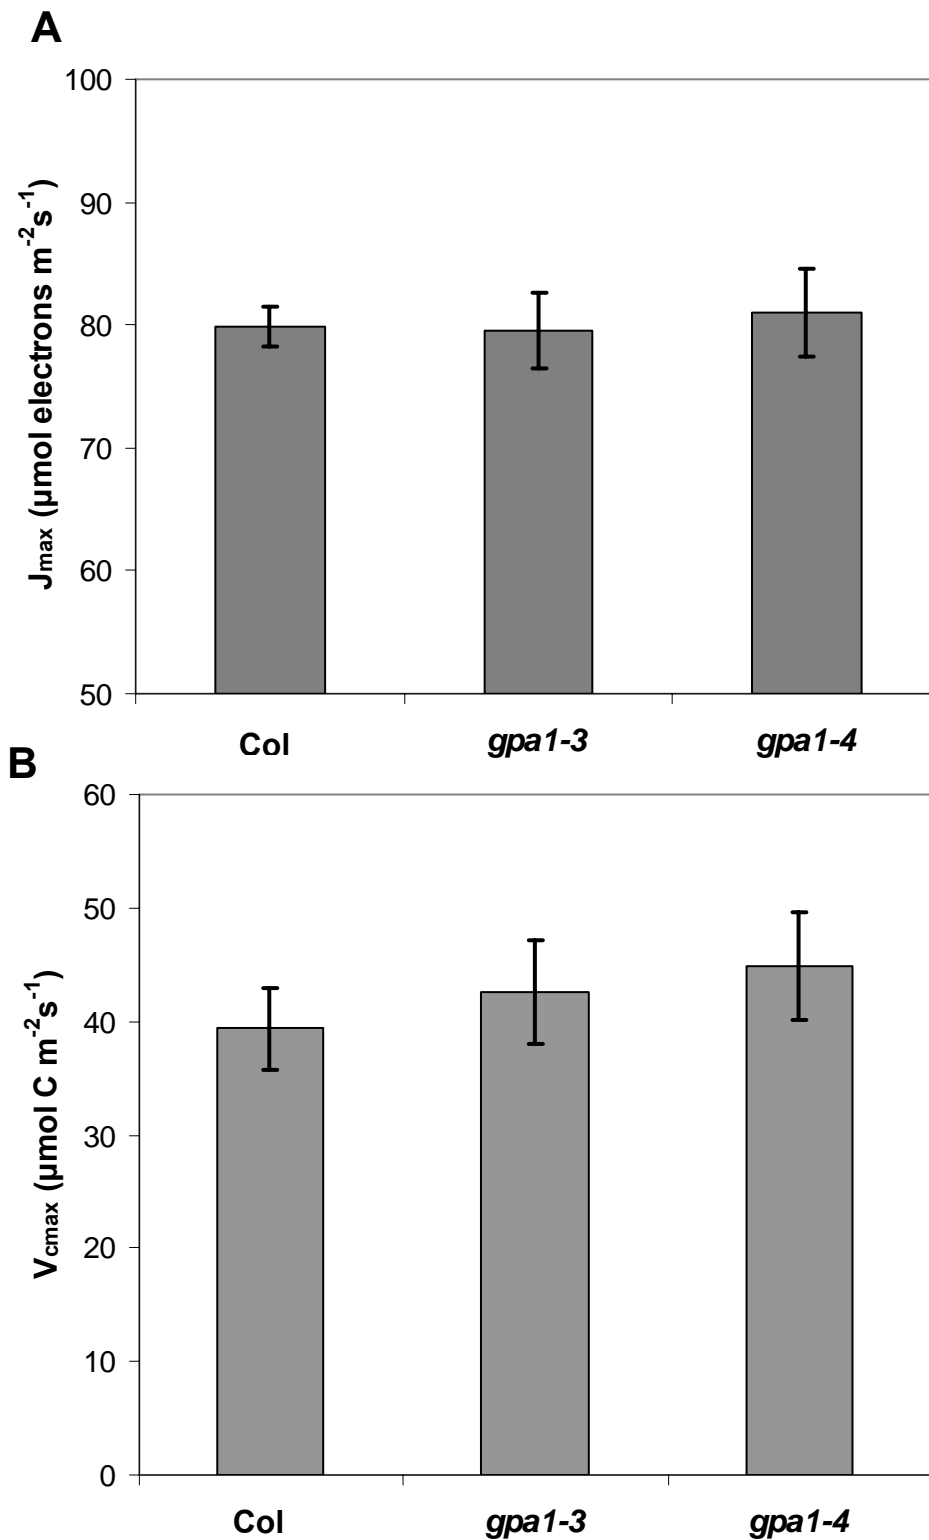

**Supplemental Figure 1.** *gpa1* mutants do not significantly differ from Col for  $J_{\max}$  (A) or  $V_{\text{cmax}}$  (B).  $V_{\text{cmax}}$  values were calculated from  $g_s$  only, and could possibly be higher if mesophyll conductances were also taken into account. Error bars represent standard error.

Col

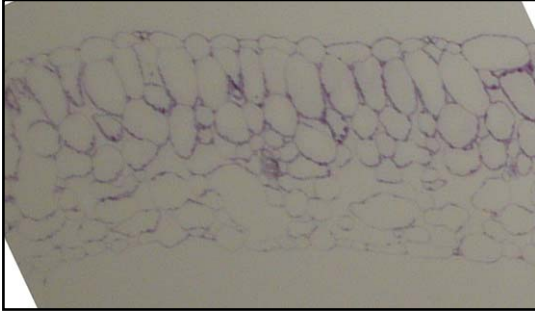

*gpa1-3*

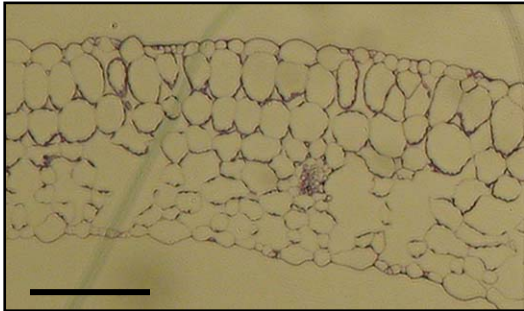

**Supplemental Figure 2.** There are no obvious differences in leaf thickness or anatomy between Col and *gpa1-3*. Shown are characteristic transverse sections from Col and *gpa1-3* leaves. Five leaves from five individual *gpa1-3* and Col plants were sectioned and examined. Scale bar = 100  $\mu\text{m}$ .

**Supplemental Table I.** ANOVA table for ample water/ drought TE experiment

| Source                    | d.o.f. | Mean Square | F-statistic | p-value |
|---------------------------|--------|-------------|-------------|---------|
| Genotype                  | 2      | 1.650       | 38.81       | <.001   |
| Water level               | 1      | 5.873       | 138.16      | <.001   |
| Block                     | 6      | 0.103       | 2.41        | 0.033   |
| Genotype x<br>water level | 2      | 0.081       | 1.90        | 0.156   |
| Error                     | 91     | 0.0425      |             |         |

**Supplemental Table II.** ANOVA table for ample water/ drought  $\delta^{13}\text{C}$  analysis

| Source                    | d.o.f. | Mean Square | F-statistic | p-value |
|---------------------------|--------|-------------|-------------|---------|
| Genotype                  | 2      | 4.4590      | 158.76      | <.001   |
| Water level               | 1      | 3.8378      | 136.64      | <.001   |
| Block                     | 6      | 0.4253      | 15.14       | <.001   |
| Genotype x<br>water level | 2      | 0.0016      | 0.06        | 0.946   |
| Error                     | 82     | 0.0281      |             |         |

**Supplemental Table III.** ANOVA table for ABA treatment  $\delta^{13}\text{C}$  analysis

| Source        | d.o.f. | Mean Square | F-statistic | p-value |
|---------------|--------|-------------|-------------|---------|
| Genotype      | 2      | 2.895       | 15.50       | <.001   |
| ABA treatment | 1      | 175.298     | 938.82      | <.001   |
| Block         | 1      | 0.001       | 0.00        | 0.955   |
| Error         | 65     | 0.187       |             |         |

**Supplemental Table IV.** ANOVA table for TE before flowering

| Source   | d.o.f. | Mean Square | F-statistic | p-value |
|----------|--------|-------------|-------------|---------|
| Genotype | 2      | 0.864       | 17.30       | <.001   |
| Block    | 3      | 0.089       | 1.78        | 0.160   |
| Error    | 60     | 0.050       |             |         |

**Supplemental Table V.** ANOVA table for TE after flowering

| Source   | d.o.f. | Mean Square | F-statistic | p-value |
|----------|--------|-------------|-------------|---------|
| Genotype | 2      | 0.666       | 14.34       | <.001   |
| Block    | 3      | 0.363       | 7.81        | <.001   |
| Error    | 63     | 0.046       |             |         |

**Supplemental Table VI.** ANOVA table for inflorescence TE

| Source   | d.o.f. | Mean Square | F-statistic | p-value |
|----------|--------|-------------|-------------|---------|
| Genotype | 2      | 0.178       | 4.29        | 0.018   |
| Block    | 3      | 0.185       | 4.46        | 0.007   |
| Error    | 63     | 0.041       |             |         |

**Supplemental Table VII.** ANOVA table for percent of total biomass allocated to inflorescence

| Source   | d.o.f. | Mean Square | F-statistic | p-value |
|----------|--------|-------------|-------------|---------|
| Genotype | 2      | 417.77      | 8.27        | <.001   |
| Block    | 3      | 142.75      | 2.83        | 0.046   |
| Error    | 63     | 50.49       |             |         |
